# Supplementary material for: Influence of Rainfall on Leptospira Infection and Disease in a Tropical Urban Setting, Brazil
Source: PubMed Central journal article supplement (PMC6986844; doi:10.3201/eid2602.190102), 2020-02
Supplement: 19-0102-Techapp-s1.pdf [file 19-0102-Techapp-s1.pdf]

# Influence of Rainfall on *Leptospira* Infection and Disease in a Tropical Urban Setting, Brazil

## Appendix

**Appendix Table 1.** Diagnostic criteria of confirmed-positive cases of leptospirosis requiring hospitalization from 2 reference hospitals in Salvador, Brazil, January 2013–April 2015\*

| No. cases confirmed positive (%)<br>N = 161† | Culture  | MAT‡     | ELISA 1§ | PCR      |
|----------------------------------------------|----------|----------|----------|----------|
| 60 (37.3)                                    | Negative | Positive | Positive | Negative |
| 23 (14.2)                                    | Negative | Positive | NA       | Negative |
| 18 (11.2)                                    | Negative | Positive | Positive | NA       |
| 17 (10.6)                                    | Negative | Positive | Positive | Positive |
| 7 (4.3)                                      | Negative | Negative | NA       | Positive |
| 7 (4.3)                                      | Negative | Negative | Negative | Positive |
| 4 (2.5)                                      | Negative | Positive | NA       | Positive |
| 4 (2.5)                                      | Negative | Positive | Negative | Negative |
| 2 (1.2)                                      | Positive | Positive | NA       | Positive |
| 2 (1.2)                                      | Positive | Negative | NA       | Positive |
| 2 (1.2)                                      | Positive | Negative | NA       | Negative |
| 2 (1.2)                                      | NA       | Positive | NA       | Positive |
| 2 (1.2)                                      | NA       | Positive | Positive | Negative |
| 2 (1.2)                                      | Positive | Positive | Positive | Positive |
| 2 (1.2)                                      | Negative | Positive | Negative | Positive |
| 2 (1.2)                                      | NA       | Positive | Positive | NA       |
| 1 (0.62)                                     | Positive | Positive | NA       | Negative |
| 1 (0.62)                                     | NA       | Positive | NA       | Negative |
| 1 (0.62)                                     | Positive | Positive | Negative | Positive |
| 1 (0.62)                                     | Negative | Negative | Positive | Positive |
| 1 (0.62)                                     | Positive | Positive | Positive | NA       |

\*Positive samples were defined as a  $\geq 4$ -fold rise in MAT titers of paired serum samples, MAT titers  $\geq 1:800$  in a single sample, or positive PCR. Diagnostic tests are marked as NA if the diagnostic test was not performed. MAT, microscopic agglutination test; NA, not available.

†Total number of confirmed positive symptomatic hospitalized patients from the 2 reference hospitals based on panel of diagnostic tests.

‡MAT positivity was determined as having titers  $\geq 1:800$  in a single sample or a  $\geq 4$ -fold rise in MAT titers for paired serum samples.

**Appendix Table 2.** Characteristics of confirmed positive hospitalized cases from 2 reference hospitals in Salvador, Brazil, January 2013–April 2015

| Characteristic                                    | No. responses | Mean (SD) or % of group |
|---------------------------------------------------|---------------|-------------------------|
| <b>Clinical symptoms</b>                          |               |                         |
| No. days of symptoms before admission to hospital | 161           | 7.2 (3.5)               |
| <b>Complications during hospital stay</b>         |               |                         |
| Fever                                             | 161           | 100.0%                  |
| Conjunctival suffusion                            | 159           | 8.8%                    |
| Jaundice                                          | 160           | 73.8%                   |
| <b>Outcome</b>                                    |               |                         |
| Days spent in hospital                            | 161           | 11.2 (10.4)             |
| Case-fatality rate                                | 161           | 7.5%                    |

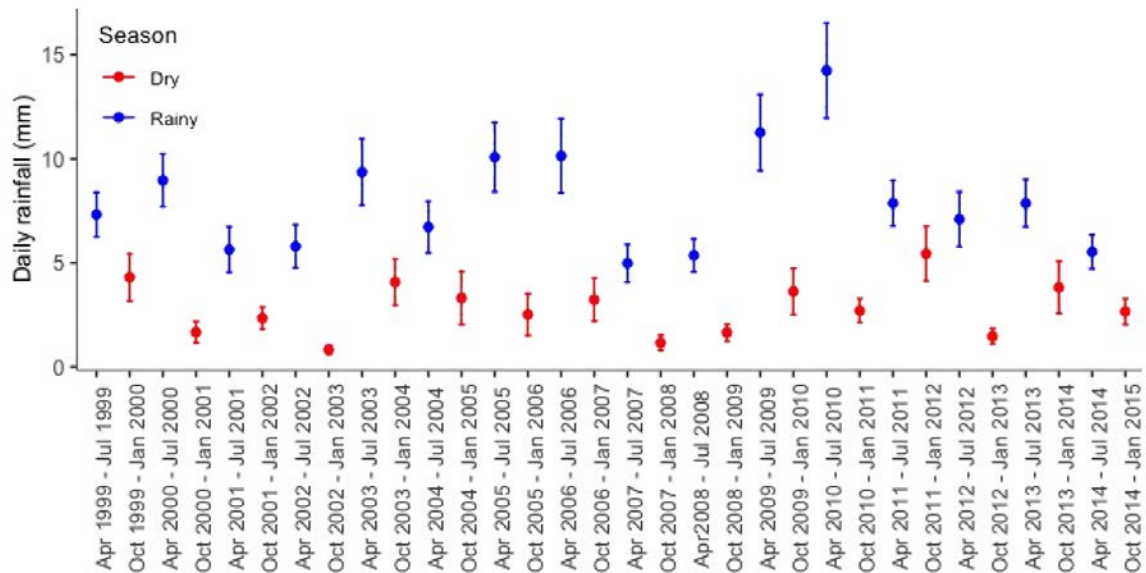

**Appendix Figure.** Seasonal cumulative rainfall in Salvador, Brazil, 1999–2015. The rainy season typically occurs April–July (red) and the dry season October–January (red). Black vertical lines denote the start of the seasonal follow-up periods evaluated in the study.
